# Supplementary material for: Weight and see: Line bisection in neglect reliably measures the allocation of attention, but not the perception of length
Source: PubMed Central journal article supplement — Neuropsychologia. 2017 Nov;106:146–58. doi: 10.1016/j.neuropsychologia.2017.09.014 (PMC5701703; doi:10.1016/j.neuropsychologia.2017.09.014), 2017-11
Supplement: mmc1.pdf [file mmc1.pdf]

The following 32 pages contain stimulus lines for a basic 'endpoint weightings' bisection task, first described in Experiment 1 of:

McIntosh, R. D., Schindler, I., Birchall, D., & Milner, A. D. (2005). Weights and measures: A new look at bisection behaviour in neglect. *Cognitive Brain Research*, 25(3), 833-850.

These stimuli should be printed single-sided on A4, with one page per sheet. Care must be taken to ensure that the printer settings result in the stimuli being printed with left and right endpoints of the lines always at exactly 40 or 80 mm from the midline of the printed page (i.e. line lengths of 80, 120 or 160 mm). To achieve this, it is suggested that the stimuli are printed at actual size (i.e. no auto scaling), and centred.

This will produce a set of 32 stimuli, eight for each of four unique lines, with left/right endpoint positions, in mm relative to the centre of the page, at: -40/+40; -40/+80; -80/+40, -80/+80 .

The asymmetrical stimuli are mirror-images of one another. To avoid confusing these stimuli, it is essential that they remain oriented as printed. It is similarly essential, when presenting the lines for bisection, that it is known for certain which way the sheet was oriented with respect to the participant. To facilitate this, it is suggested that the stimuli are numbered, printed or marked in a fixed position on the non-stimulus side before the stimuli are used. (No extra marks should be made on the stimulus side, prior to presentation.)

The ordering of the line stimuli in this document corresponds to the fixed random order used in the above-cited reference, although any other pseudo-random order that avoids undue clustering of any one stimulus line, should be just as good.

For further details on administration, scoring and analysis of this test, see the above-cited reference. The procedure is also described in:

McIntosh, R. D. (2017). The end of the line: Antagonistic attentional weightings in unilateral neglect. *Cortex*.  
<https://doi.org/10.1016/j.cortex.2017.07.011>

McIntosh, R. D., Ietswaart, M., & Milner, A. D. (2017). Weight and see: line bisection in neglect reliably measures the allocation of attention, but not the perception of length. *Neuropsychologia*.  
<https://doi.org/10.1016/j.neuropsychologia.2017.09.014>

A digital version of the task, suitable for touchscreens, can be found at the Open Science Framework <<https://osf.io/exps2/>>.

\_\_\_\_\_

\_\_\_\_\_

\_\_\_\_\_

---

\_\_\_\_\_

\_\_\_\_\_

---



\_\_\_\_\_

\_\_\_\_\_

---

---

---

\_\_\_\_\_

---

\_\_\_\_\_



---

---

\_\_\_\_\_

---

\_\_\_\_\_

\_\_\_\_\_

\_\_\_\_\_

\_\_\_\_\_



\_\_\_\_\_

---

---

---

\_\_\_\_\_

---

---

\_\_\_\_\_



\_\_\_\_\_
